# Supplementary material for: Relict groups of spiny frogs indicate Late Paleogene-Early Neogene trans-Tibet dispersal of thermophile faunal elements
Source: bioRxiv or medRxiv preprint supplement (doi:10.1101/2021.02.18.430751), 2021-02-18
Supplement: Supplementary file [file media-2.pdf]

Supplemental Information Fig. S2

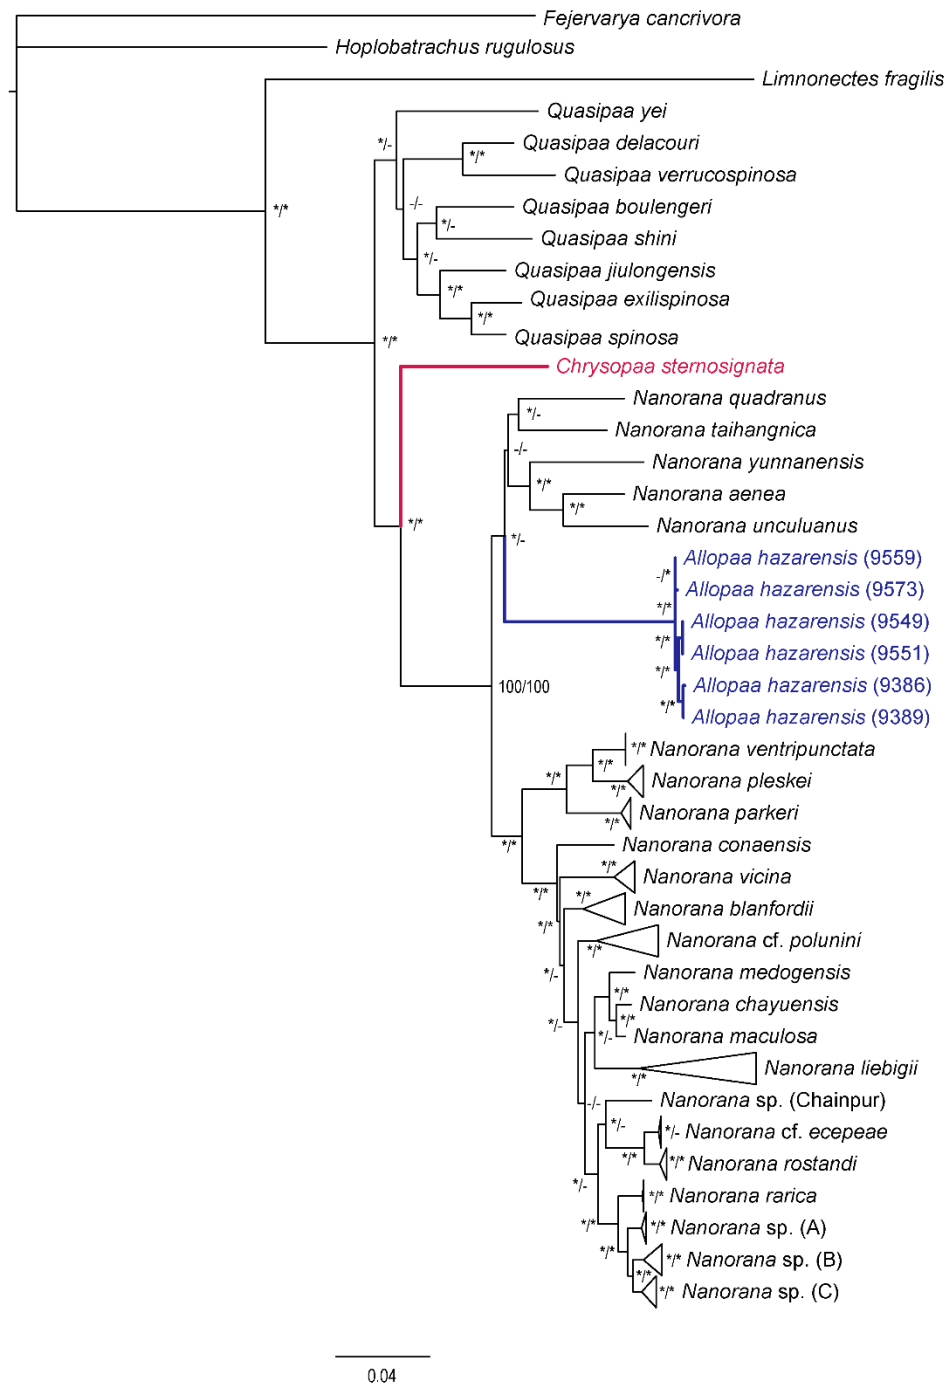

**IQ-TREE topology.** SH-aLRT ( $\geq 70$ ) and ultrafast bootstrap support ( $\geq 90$ ) values are indicated with an asterisk at the respective node.

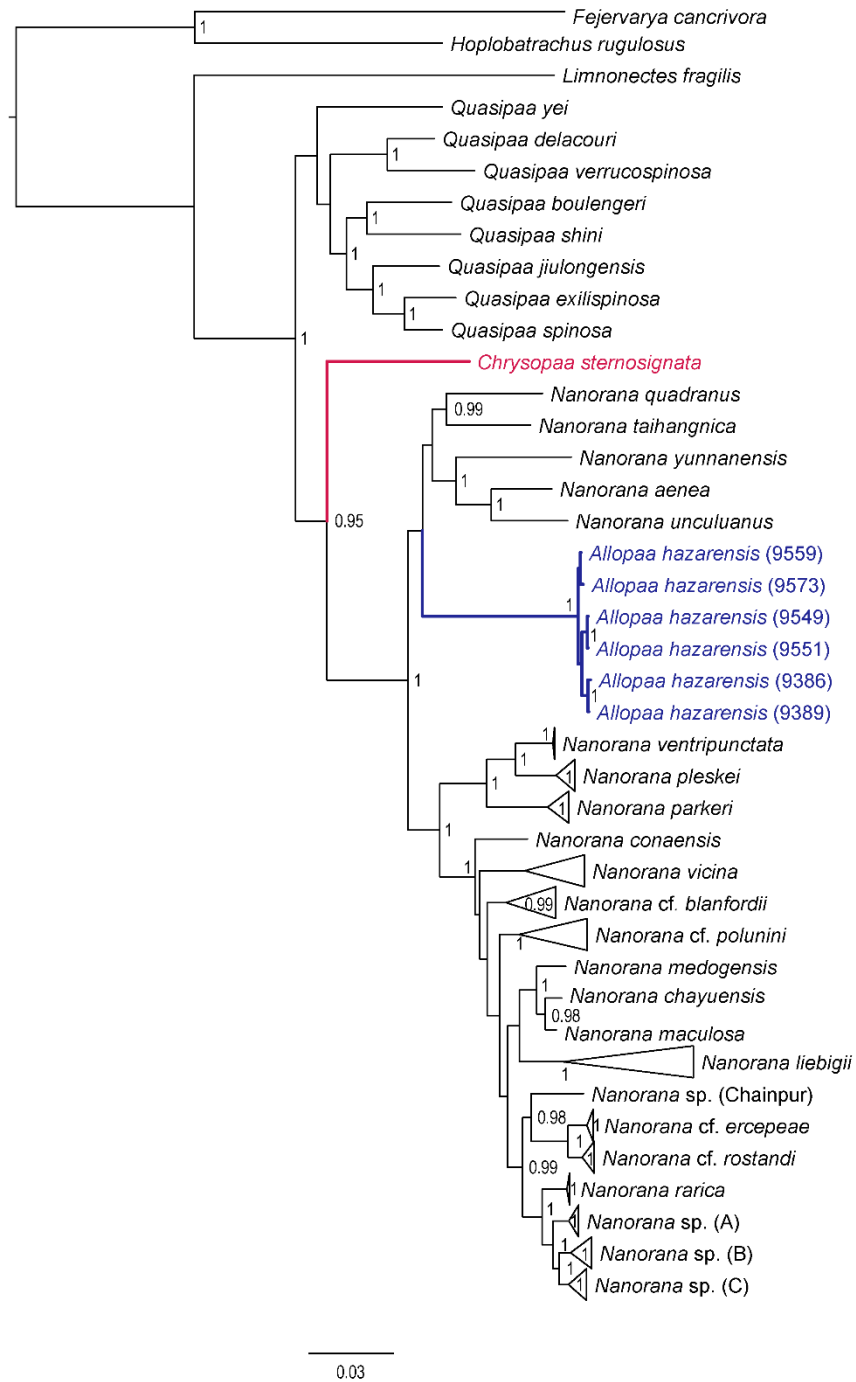

**MrBayes tree generated with the standard 4×4 model of DNA substitution.** Posterior probabilities  $\geq 0.90$  are shown at the respective node.
